# Supplementary material
Source: PubMed Central journal article supplement (PMC6139047)
Supplement: NIHMS1500905-supplement-2.pdf [file NIHMS1500905-supplement-2.pdf]

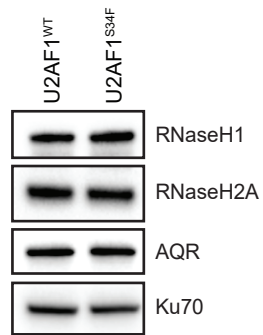

**Supplementary Figure S2. Protein expression levels of R loop regulators in U2AF1<sup>WT</sup> or U2AF1<sup>S34F</sup> expressing cells.** HeLa cells stably expressing U2AF1<sup>WT</sup> or U2AF1<sup>S34F</sup> mutant were grown asynchronously. Levels of indicated proteins were analyzed by western blot.
