# Supplementary material
Source: PubMed Central journal article supplement (PMC6139047)
Supplement: NIHMS1500905-supplement-3.pdf [file NIHMS1500905-supplement-3.pdf]

**A**

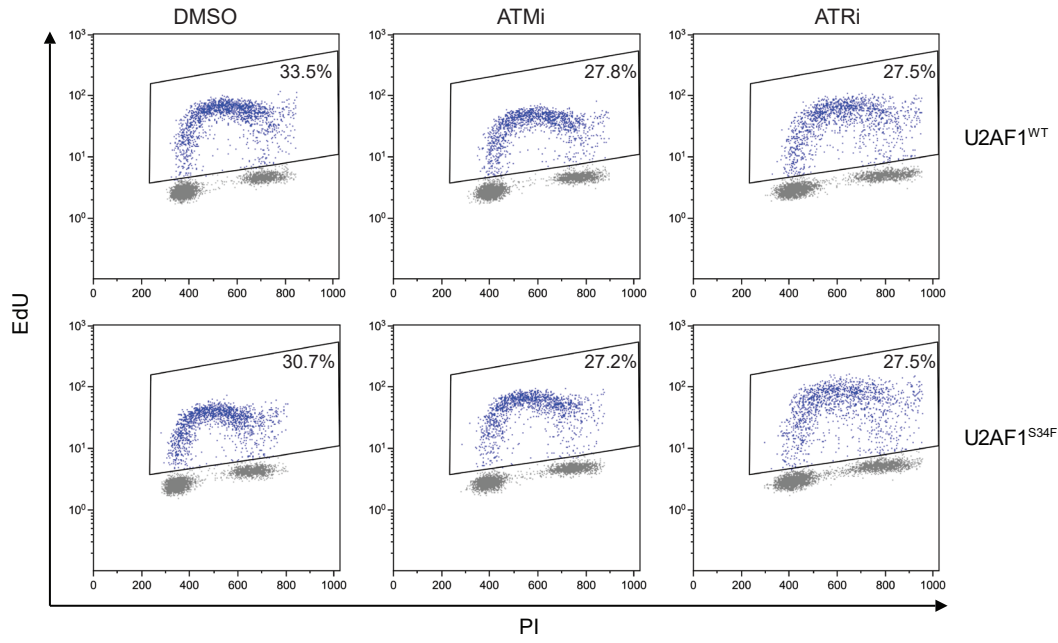

**B**

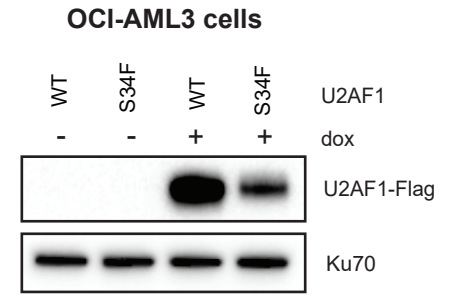

**Supplementary Figure S3. Expression of wild type or different mutants of U2AF1.** (A) HeLa cells stably expressing U2AF1<sup>WT</sup> or U2AF1<sup>S34F</sup> mutant treated with DMSO, ATMi or ATRi (5  $\mu$ M) for 48h, followed by FACS analysis. (B) Flag-tagged U2AF1<sup>WT</sup> and U2AF1<sup>S34F</sup> were inducibly expressed in OCI-AML3 cells by addition of doxycycline (250 ng/mL) for 48h. Samples were collected and subjected to western blot.
