# Supplementary material
Source: PubMed Central journal article supplement (PMC6139047)
Supplement: NIHMS1500905-supplement-5.pdf [file NIHMS1500905-supplement-5.pdf]

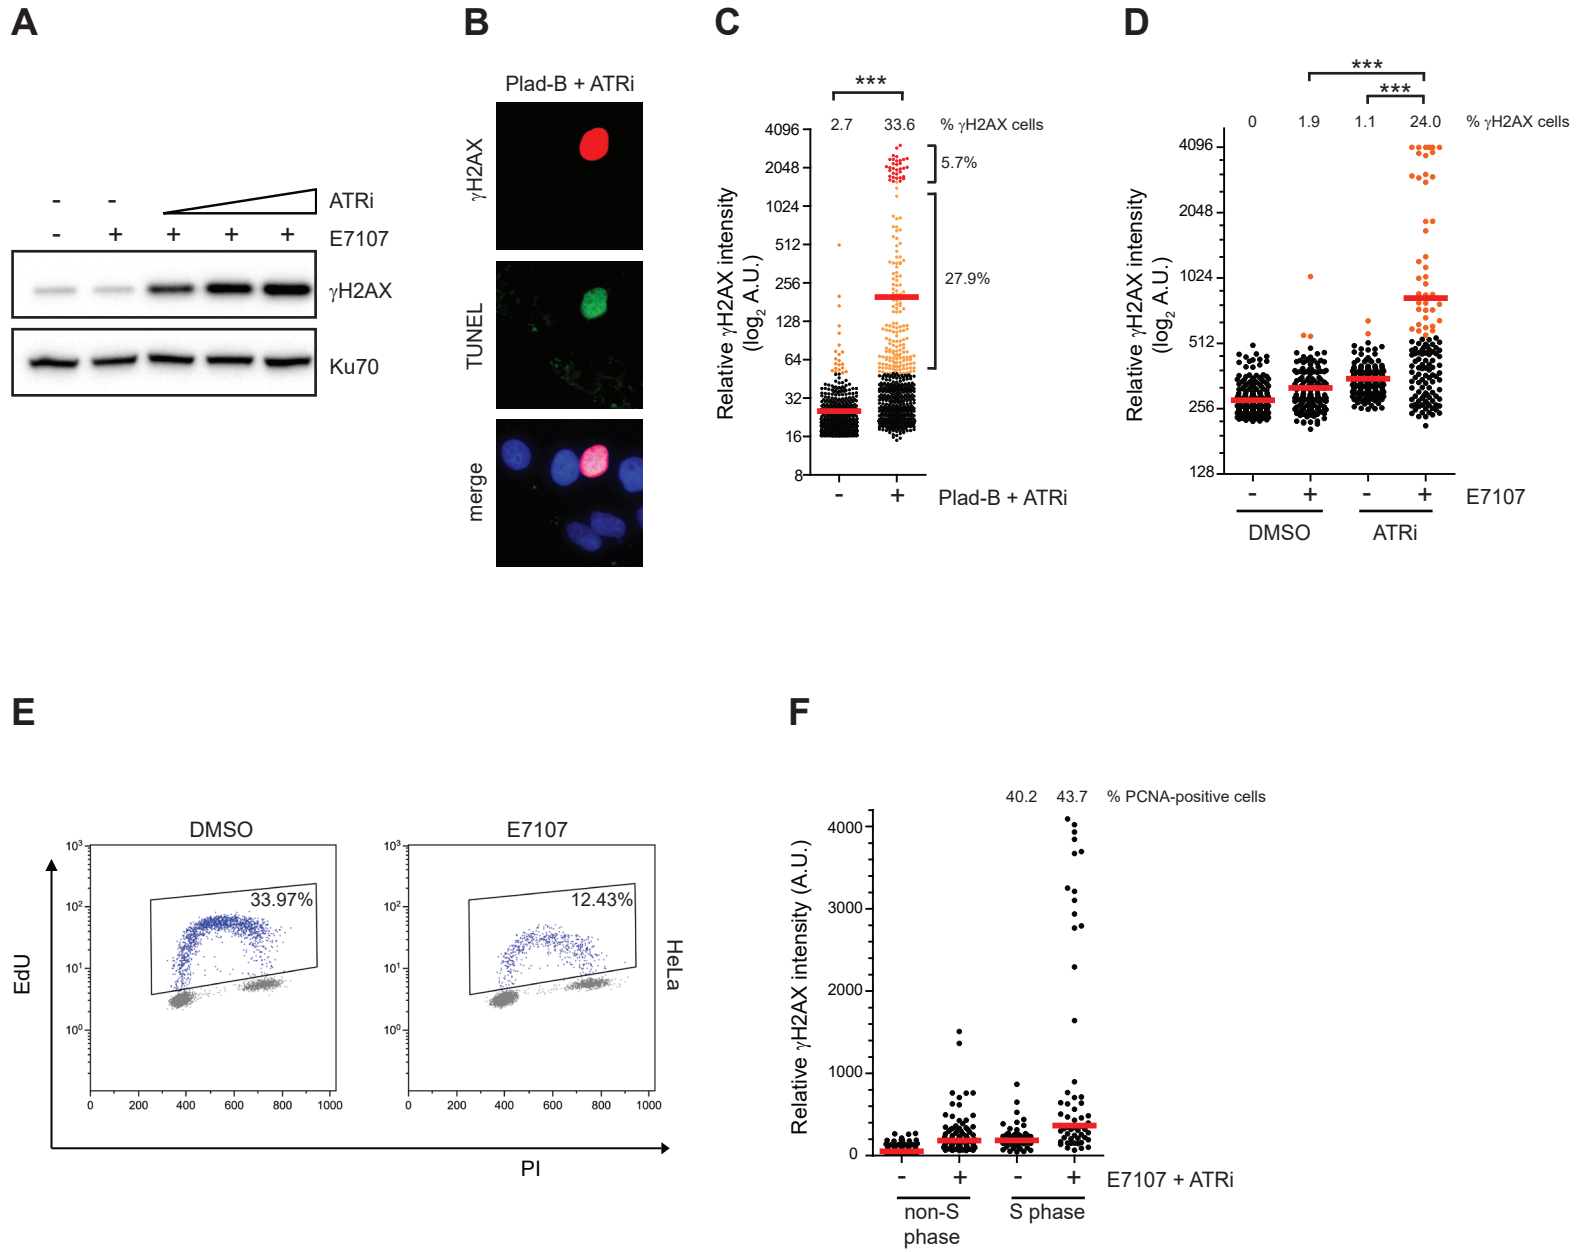

**Supplementary Figure S5. RNA splicing perturbation in cells confers sensitivity to ATR inhibitors.** (A) HeLa cells were treated with DMSO, E7107 alone, or E7107 with different ATRi concentrations (two-fold dilution, 1.25 – 5  $\mu$ M) for 24h. (B and C) HeLa cells were treated with DMSO or combination of Plad-B (1 nM) and ATRi (10  $\mu$ M) for 24h. Representative images are shown in B; In C, intensities of TUNEL and  $\gamma$ H2AX staining in individual cells were analyzed by immunofluorescence. Red bars represent the mean  $\gamma$ H2AX intensities of the indicated cell populations. Orange color indicates TUNEL-/ $\gamma$ H2AX+ cell population, red color indicates TUNEL+/ $\gamma$ H2AX+ cell population, orange color indicates only  $\gamma$ H2AX+ population. \*\*\*,  $p \leq 0.001$ . (D) HeLa cells were treated with ATRi (10  $\mu$ M) in the presence or absence of E7107 (1 nM) for 24h. Individual cells were analyzed by immunofluorescence using a  $\gamma$ H2AX antibody. Intensities of  $\gamma$ H2AX staining in individual cells were analyzed by immunofluorescence ( $n > 300$ ). Red bars represent the mean  $\gamma$ H2AX intensities of the indicated cell populations. \*\*\*,  $p \leq 0.001$ . (E) HeLa cells were either DMSO or 1 nM E7107 for 24h followed by FACS analysis. (F) HeLa cells were either treated with DMSO or combined E7107 (1 nM) and ATRi (10  $\mu$ M) for 24h, followed by immunofluorescence staining using anti-PCNA (S phase marker) and anti- $\gamma$ H2AX antibodies. Red bars represent the median  $\gamma$ H2AX intensities of the indicated cell populations.
