# Supplementary material
Source: PubMed Central journal article supplement (PMC6139047)
Supplement: NIHMS1500905-supplement-6.pdf [file NIHMS1500905-supplement-6.pdf]

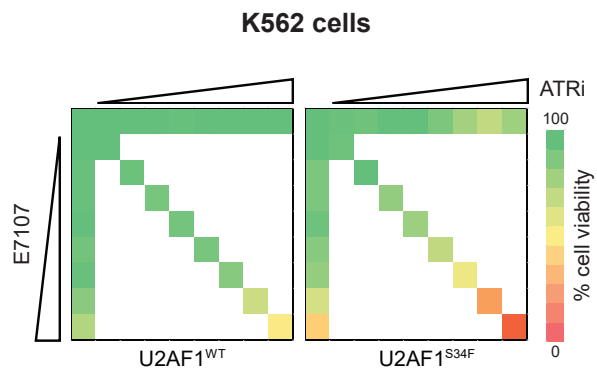

**Supplementary Figure S6. Combination of RNA splicing modulator compounds and ATR inhibition sensitizes U2AF1<sup>S34F</sup> expressing cells.** U2AF1<sup>WT</sup> and U2AF1<sup>S34F</sup>-expressing K562 cells were treated with increasing doses of E7107 (0 - 4 nM, 3 fold-dilution) or ATRi (0 – 20 μM, 3 fold-dilution) individually or in combination for 48h. Color-coding denotes the level of viability (green [100% viability] to red [0% viability]) relative to DMSO treatment.
