# Supplementary material
Source: PubMed Central journal article supplement (PMC6139047)
Supplement: NIHMS1500905-supplement-7.pdf [file NIHMS1500905-supplement-7.pdf]

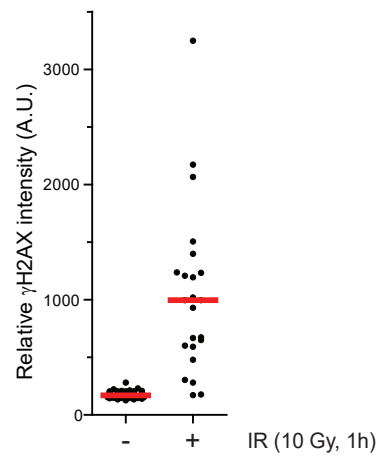

**Supplementary Figure S7. Immunofluorescence staining of  $\gamma$ H2AX DNA damage marker in human CD34+ hematopoietic progenitor cells.** Human CD34-positive hematopoietic progenitor cells were isolated from human umbilical cord blood. Cells were either left untreated or irradiated (10 Gy) for 1h. Intensities of  $\gamma$ H2AX staining in individual cells were analyzed by immunofluorescence (n>25). Red bars represent the median  $\gamma$ H2AX intensities of the indicated cell populations.
